# Supplementary material
Source: PubMed Central journal article supplement (PMC4012336)
Supplement: NIHMS573634-supplement-Supp_Table_S1.pdf [file NIHMS573634-supplement-Supp_Table_S1.pdf]

|             |                             |         |        |         |    |    |          |        |                    |            |         |               |                |   |   |   |   |   |   |   |
|-------------|-----------------------------|---------|--------|---------|----|----|----------|--------|--------------------|------------|---------|---------------|----------------|---|---|---|---|---|---|---|
| COLO205     | Colon                       | p.V600E | WT     | WT      | WT | WT | WT       | WT     | WT                 | WT         | WT      | WT33_L111>L   | 0              | 0 | 0 | 0 | 0 | 0 | 0 | 0 |
| LS174T      | Colon                       | WT      | p.S45F | WT      | WT | WT | c.35G>A  | WT     | p.H1047R           | WT         | WT      | WT            | WT             | 0 | 0 | 0 | 0 | 0 | 0 | 0 |
| SW1116      | Colon                       | WT      | WT     | WT      | WT | WT | c.35G>C  | WT     | WT                 | WT         | WT      | p.A159D       | 0              | 0 | 0 | 0 | 0 | 0 | 0 | 0 |
| HT-29       | Colon                       | p.V600E | WT     | WT      | WT | WT | WT       | WT     | p.P449T            | WT         | WT      | WT            | p.R273H        | 0 | 0 | 1 | 0 | 0 | 0 | 0 |
| NCI-H508    | Colon                       | p.G596R | WT     | WT      | WT | WT | WT       | WT     | p.E545K            | WT         | WT      | WT            | p.R273H        | 0 | 0 | 0 | 0 | 0 | 0 | 0 |
| KM12        | Colon                       | WT      | WT     | WT      | WT | WT | WT       | WT     | WT 29*, p.K267fs*9 | WT         | WT      | WT            | p.R72fs*51     | 0 | 0 | 0 | 0 | 0 | 0 | 0 |
| SW480       | Colon                       |         |        |         |    |    |          |        |                    |            |         |               |                | 0 | 0 | 1 | 0 | 0 | 0 | 0 |
| NCI-H716    | Colon                       | WT      | WT     | WT      | WT | WT | WT       | WT     | WT                 | WT         | WT      | p.E224D       | 0              | 0 | 1 | 0 | 0 | 0 | 0 | 0 |
| RKO         | Colon                       | p.V600E | WT     | WT      | WT | WT | WT       | WT     | p.H1047R           | WT         | WT      | WT            | WT             | 0 | 0 | 0 | 0 | 0 | 0 | 0 |
| LS1034      | Colon                       | WT      | WT     | WT      | WT | WT | c.436G>A | WT     | WT                 | WT         | WT      | WT 3245S, WT  | 0              | 0 | 0 | 0 | 0 | 0 | 0 | 0 |
| NCI-H747    | Colon                       | WT      | WT     | WT      | WT | WT | c.38G>A  | WT     | WT                 | WT         | WT      | p.R158L       | 0              | 0 | 0 | 0 | 0 | 0 | 0 | 0 |
| HCC2998     | Colon                       | WT      | WT     | WT      | WT | WT | c.436G>A | WT     | WT                 | WT         | p.E137* | WT            | p.R213*        | 0 | 0 | 0 | 0 | 0 | 0 | 0 |
| COLO 320HSR | Colon                       | WT      | WT     | WT      | WT | WT | WT       | WT     | WT                 | WT         | WT      | WT            | p.R248W        | 0 | 0 | 1 | 0 | 0 | 0 | 0 |
| SW403       | Colon                       | WT      | WT     | WT      | WT | WT | c.35G>T  | WT     | WT                 | WT         | WT      | WT            | WT 4, p.P309S  | 0 | 0 | 0 | 0 | 0 | 0 | 0 |
| SW948       | Colon                       | WT      | WT     | WT      | WT | WT | c.182A>T | WT     | p.E542K            | WT         | WT      | WT            | WT             | 0 | 0 | 0 | 0 | 0 | 0 | 0 |
| Y79         | Eye                         |         |        |         |    |    |          |        |                    |            |         |               |                | 0 | 0 | 0 | 0 | 1 | 0 | 0 |
| JM-1        | Haematopoietic and lymphoid |         |        |         |    |    |          |        |                    |            |         |               |                | 0 | 0 | 0 | 0 | 0 | 0 | 0 |
| MOLT-4      | Haematopoi                  | WT      |        |         |    |    |          | p.G12C | WT                 | p.K267fs*9 | WT      | p.Q214*       | p.R306*        | 0 | 0 | 0 | 0 | 0 | 0 | 0 |
| Daudi       | Haematopoi                  | WT      | WT     | WT      | WT | WT | WT       | WT     | WT                 | WT         | WT      | WT            | p.G266E        | 0 | 0 | 0 | 0 | 0 | 0 | 0 |
| EB-3        | Haematopoi                  | WT      | WT     | WT      | WT | WT | WT       | WT     | WT                 | WT         | WT      | WT            | WT             | 0 | 0 | 0 | 0 | 0 | 0 | 0 |
| P3HR1       | Haematopoietic and lymphoid |         |        |         |    |    |          |        |                    |            |         |               |                | 0 | 0 | 0 | 0 | 0 | 0 | 0 |
| HT          | Haematopoi                  | WT      | WT     | WT      | WT | WT | WT       | WT     | WT                 | p.?        | WT      | WT 4, p.R273H | 0              | 0 | 0 | 0 | 0 | 0 | 0 | 0 |
| HL-60       | Haematopoi                  | WT      | WT     | WT      | WT | WT | WT       | p.Q61L | WT                 | WT         | WT      | WT 41_*394del | 0              | 0 | 1 | 0 | 0 | 0 | 0 | 0 |
| HuNS1       | Haematopoietic and lymphoid |         |        |         |    |    |          |        |                    |            |         |               |                | 0 | 0 | 0 | 0 | 0 | 0 | 0 |
| MOLT-16     | Haematopoi                  | WT      | WT     | WT      | WT | WT | WT       | WT     | WT                 | WT         | WT      | WT            | p.R158H        | 0 | 0 | 0 | 0 | 0 | 0 | 0 |
| ST486       | Haematopoi                  | WT      | WT     | WT      | WT | WT | WT       | WT     | WT                 | WT         | WT      | WT 4, p.N239D | 0              | 0 | 0 | 0 | 0 | 0 | 0 | 0 |
| Raji        | Haematopoi                  | WT      | WT     | WT      | WT | WT | WT       | WT     | WT                 | WT         | WT      | WT 2, p.Y234H | 0              | 0 | 0 | 0 | 0 | 0 | 0 | 0 |
| CEM-C1      | Haematopoietic and lymphoid |         |        |         |    |    |          |        |                    |            |         |               |                | 0 | 0 | 0 | 0 | 0 | 0 | 0 |
| BC-1        | Haematopoi                  | WT      | WT     | WT      | WT | WT | WT       | WT     | WT                 | WT         | WT      | WT            | WT             | 0 | 0 | 1 | 0 | 0 | 0 | 0 |
| CRO-AP2     | Haematopoi                  | WT      | WT     | WT      | WT | WT | WT       | WT     | WT                 | WT         | WT      | WT            | WT             | 0 | 0 | 0 | 0 | 0 | 0 | 0 |
| BC-3        | Haematopoi                  | WT      | WT     | WT      | WT | WT | WT       | WT     | p.P248fs*4         | p.Q217*    | WT      | WT            | WT             | 0 | 0 | 0 | 0 | 0 | 0 | 0 |
| ARH-77      | Haematopoi                  | WT      | WT     | WT      | WT | WT | WT       | WT     | WT                 | WT         | WT      | WT            | p.R273H        | 0 | 0 | 0 | 0 | 0 | 0 | 0 |
| SR          | Haematopoi                  | WT      | WT     | WT      | WT | WT | WT       | WT     | WT                 | WT         | WT      | WT            | WT             | 0 | 0 | 0 | 0 | 0 | 0 | 0 |
| RL          | Haematopoi                  | WT      | WT     | WT      | WT | WT | WT       | WT     | WT                 | WT         | WT      | WT            | p.A138P        | 0 | 0 | 0 | 0 | 0 | 0 | 0 |
| DB          | Haematopoi                  | WT      | WT     | WT      | WT | WT | WT       | WT     | WT                 | WT         | WT      | WT            | p.R248Q        | 0 | 0 | 0 | 0 | 0 | 0 | 0 |
| RPMI6666    | Haematopoi                  | WT      | WT     | WT      | WT | WT | WT       | WT     | WT                 | WT         | WT      | WT            | WT             | 0 | 0 | 0 | 0 | 0 | 0 | 0 |
| MC/CAR      | Haematopoi                  | WT      | WT     | WT      | WT | WT | WT       | WT     | WT                 | WT         | WT      | WT            | WT             | 0 | 0 | 0 | 0 | 0 | 0 | 0 |
| RPMI 8226   | Haematopoi                  | WT      | WT     | p.T751I | WT | WT | c.35G>C  | WT     | WT                 | WT         | WT      | WT            | p.E285K        | 0 | 0 | 0 | 0 | 0 | 0 | 0 |
| GDM-1       | Haematopoi                  | WT      | WT     | WT      | WT | WT | WT       | WT     | WT                 | WT         | WT      | WT            | WT             | 0 | 0 | 0 | 0 | 0 | 0 | 0 |
| CESS        | Haematopoi                  | WT      | WT     | WT      | WT | WT | WT       | WT     | WT                 | WT         | WT      | WT            | WT             | 0 | 0 | 0 | 0 | 0 | 0 | 0 |
| HuT78       | Haematopoietic and lymphoid |         |        |         |    |    |          |        |                    |            |         |               |                | 0 | 0 | 0 | 0 | 0 | 0 | 0 |
| BC-2        | Haematopoietic and lymphoid |         |        |         |    |    |          |        |                    |            |         |               |                | 0 | 0 | 0 | 0 | 0 | 0 | 0 |
| THP-1       | Haematopoietic and lymphoid |         |        |         |    |    |          |        |                    |            |         |               |                | 0 | 0 | 0 | 0 | 0 | 0 | 0 |
| K-562       | Haematopoi                  | WT      | WT     | WT      | WT | WT | WT       | WT     | WT                 | WT         | WT      | WT            | Q136fs*13      | 0 | 0 | 0 | 0 | 0 | 0 | 0 |
| HEL 92.1.7  | Haematopoietic and lymphoid |         |        |         |    |    |          |        |                    |            |         |               |                | 0 | 0 | 0 | 0 | 0 | 0 | 0 |
| CRO-AP5     | Haematopoi                  | WT      | WT     | WT      | WT | WT | WT       | WT     | WT                 | WT         | WT      | WT            | WT             | 0 | 0 | 0 | 0 | 0 | 0 | 0 |
| SKO-007     | Haematopoietic and lymphoid |         |        |         |    |    |          |        |                    |            |         |               |                | 0 | 0 | 0 | 0 | 0 | 0 | 0 |
| MV-4-11     | Haematopoi                  | WT      | WT     | WT      | WT | WT | WT       | WT     | WT                 | WT         | WT      | WT            | WT             | 0 | 0 | 0 | 0 | 0 | 0 | 0 |
| CML-T1      | Haematopoi                  | WT      | WT     | WT      | WT | WT | WT       | WT     | WT                 | WT         | WT      | WT            | WT             | 0 | 0 | 0 | 0 | 0 | 0 | 0 |
| U266B1      | Haematopoietic and lymphoid |         |        |         |    |    |          |        |                    |            |         |               |                | 0 | 0 | 0 | 0 | 0 | 0 | 0 |
| ML-2        | Haematopoi                  | WT      | WT     | WT      | WT | WT | c.436G>A | WT     | WT                 | WT         | WT      | WT            | WT             | 0 | 0 | 0 | 0 | 0 | 0 | 0 |
| EM-2        | Haematopoi                  | WT      | WT     | WT      | WT | WT | WT       | WT     | WT                 | WT         | WT      | WT            | p.R248Q        | 0 | 0 | 0 | 0 | 0 | 0 | 0 |
| BV-173      | Haematopoi                  | WT      | WT     | WT      | WT | WT | WT       | WT     | WT                 | WT         | WT      | WT            | WT             | 0 | 0 | 1 | 0 | 0 | 0 | 0 |
| NALM-1      | Haematopoi                  | WT      | WT     | WT      | WT | WT | WT       | WT     | WT                 | WT         | WT      | WT            | WT             | 0 | 0 | 0 | 0 | 0 | 0 | 0 |
| J-RT3-T3-5  | Haematopoi                  | WT      | WT     | WT      | WT | WT | WT       | WT     | WT 11, p.Q245fs*20 | WT         | WT      | WT            | WT 3, G361fs*8 | 0 | 0 | 0 | 0 | 0 | 0 | 0 |
| MJ          | Haematopoi                  | WT      | WT     | WT      | WT | WT | WT       | WT     | WT                 | WT         | WT      | WT            | WT             | 0 | 0 | 0 | 0 | 0 | 0 | 0 |
| TO175.T     | Haematopoietic and lymphoid |         |        |         |    |    |          |        |                    |            |         |               |                | 0 | 0 | 0 | 0 | 0 | 0 | 0 |
| SCC-25      | Head and N                  | WT      | WT     | WT      | WT | WT | WT       | WT     | WT                 | WT         | WT      | WT            | p.R209fs*6     | 0 | 0 | 0 | 0 | 0 | 0 | 0 |
| SCC-13      | Head and Neck               |         |        |         |    |    |          |        |                    |            |         |               |                | 0 | 0 | 0 | 0 | 0 | 0 | 0 |
| FaDu        | Head and N                  | WT      | WT     | WT      | WT | WT | WT       | WT     | WT                 | WT         | WT      | WT            | p.R248L        | 0 | 0 | 0 | 0 | 0 | 0 | 0 |
| SCC-9       | Head and N                  | WT      | WT     | WT      | WT | WT | WT       | WT     | WT                 | WT         | WT      | WT            | WT             | 0 | 0 | 0 | 0 | 0 | 0 | 0 |
| HN5         | Head and Neck               |         |        |         |    |    |          |        |                    |            |         |               |                | 0 | 1 | 0 | 0 | 0 | 0 | 0 |
| CAL27       | Head and N                  | WT      | WT     | WT      | WT | WT | WT       | WT     | WT                 | WT         | WT      | WT            | p.H193L        | 0 | 0 | 0 | 0 | 0 | 0 | 0 |
| SCC-15      | Head and N                  | WT      | WT     | WT      | WT | WT | WT       | WT     | WT                 | WT         | WT      | WT            | p.?            | 0 | 1 | 1 | 0 | 0 | 0 | 0 |
| SCC-12      | Head and Neck               |         |        |         |    |    |          |        |                    |            |         |               |                | 0 | 0 | 0 | 0 | 0 | 0 | 0 |
| SCC-4       | Head and N                  | WT      | WT     | WT      | WT | WT | WT       | WT     | WT                 | WT         | WT      | WT            | p.P151S        | 0 | 1 | 0 | 0 | 0 | 0 | 0 |
| RPMI2650    | Head and N                  | WT      | WT     | WT      | WT | WT | WT       | WT     | WT                 | WT         | WT      | WT            | p.A205T        | 0 | 0 | 0 | 0 | 0 | 0 | 0 |
| G-402       | Kidney                      | WT      | WT     | WT      | WT | WT | WT       | WT     | WT                 | WT         | WT      | WT            | WT             | 0 | 0 | 0 | 0 | 0 | 0 | 0 |
| ACHN        | Kidney                      | WT      | WT     | WT      | WT | WT | WT       | WT     | WT                 | WT         | WT      | WT            | WT             | 0 | 0 | 0 | 0 | 0 | 0 | 0 |
| G-401       | Kidney                      | WT      | WT     | WT      | WT | WT | WT       | WT     | WT                 | WT         | WT      | WT            | WT             | 0 | 0 | 0 | 0 | 0 | 0 | 0 |
| 786-O       | Kidney                      |         |        |         |    |    |          |        |                    |            |         |               |                | 0 | 0 | 0 | 0 | 0 | 0 | 0 |
| CAL-54      | Kidney                      | WT      | WT     | WT      | WT | WT | WT       | WT     | WT                 | WT         | WT      | WT            | WT             | 0 | 0 | 0 | 0 | 0 | 0 | 0 |
| UO-31       | Kidney                      | WT      | WT     | WT      | WT | WT | WT       | WT     | WT                 | WT         | WT      | WT            | WT             | 0 | 0 | 0 | 0 | 0 | 0 | 0 |
| SK-NEP-1    | Kidney                      | WT      | WT     | WT      | WT | WT | WT       | WT     | WT                 | WT         | WT      | WT            | p.G245S        | 0 | 0 | 0 | 0 | 0 | 0 | 0 |
| Caki-1      | Kidney                      | WT      | WT     | WT      | WT | WT | WT       | WT     | WT                 | WT         | WT      | WT            | WT             | 0 | 0 | 0 | 0 | 0 | 0 | 0 |
| 769-P       | Kidney                      |         |        |         |    |    |          |        |                    |            |         |               |                | 0 | 0 | 0 | 0 | 0 | 0 | 0 |
| SN12C       | Kidney                      | WT      | WT     | WT      | WT | WT | WT       | WT     | WT                 | WT         | WT      | WT            | p.E336*        | 0 | 0 | 0 | 0 | 0 | 0 | 0 |
| TK-10       | Kidney                      | WT      | WT     | WT      | WT | WT | WT       | WT     | WT                 | WT         | WT      | WT            | p.L264R        | 0 | 0 | 0 | 0 | 0 | 0 | 0 |
| RXF393      | Kidney                      | WT      | WT     | WT      | WT | WT | WT       | WT     | WT                 | p.?        | WT      | WT            | p.R175H        | 0 | 0 | 1 | 0 | 0 | 0 | 0 |
| A-498       | Kidney                      | WT      | WT     | WT      | WT | WT | WT       | WT     | WT                 | WT         | WT      | WT            | WT             | 0 | 0 | 0 | 0 | 0 | 0 | 0 |
| Caki-2      | Kidney                      |         |        |         |    |    |          |        |                    |            |         |               |                | 0 | 0 | 0 | 0 | 0 | 0 | 0 |
| SNU-398     | Liver                       |         |        |         |    |    |          |        |                    |            |         |               |                | 0 | 0 | 0 | 0 | 0 | 0 | 0 |
| SNU-449     | Liver                       | WT      | WT     | WT      | WT | WT | WT       | WT     | WT                 | WT         | WT      | WT            | p.A161T        | 0 | 0 | 0 | 0 | 0 | 0 | 0 |
| SNU-182     | Liver                       |         |        |         |    |    |          |        |                    |            |         |               |                | 0 | 0 | 0 | 0 | 0 | 0 | 0 |
